# Supplementary material for: Risk of Ischemic Stroke Associated With Calcium Supplements With or Without Vitamin D: A Nested Case‐Control Study
Source: PubMed Central journal article supplement — J Am Heart Assoc. 2017 May 18;6(5):e005795. doi: 10.1161/JAHA.117.005795 (PMC5524112; doi:10.1161/jaha.117.005795), 2017-05-18
Supplement: JAH3-6-e005795-s001.pdf [file JAH3-6-e005795-s001.pdf]

# **SUPPLEMENTAL MATERIAL**

**Table S1. Characteristics of cases and controls. New-user approach.**

|                                | <b>Cases (%)<br/>n= 2,493</b> | <b>Controls (%)<br/>n= 18,092</b> | <b>Non adjusted OR*<br/>(95% CI)</b> |
|--------------------------------|-------------------------------|-----------------------------------|--------------------------------------|
| Age mean in years ( $\pm$ SD)  | 71.81 (10.95)                 | 71.76 (11.27)                     | 1.00 (1.00-1.00)                     |
| Men                            | 1,373 (55.07)                 | 10,067 (55.64)                    | 1.02 (0.94-1.12)                     |
| Visits (n)                     |                               |                                   |                                      |
| <6                             | 282 (11.31)                   | 3,358 (18.56)                     | 1 (ref.)                             |
| 6-15                           | 848 (34.02)                   | 7,399 (40.90)                     | 1.42 (1.24-1.64)                     |
| 16-24                          | 724 (29.04)                   | 4,359 (24.09)                     | 2.10 (1.81-2.44)                     |
| 25 +                           | 639 (25.63)                   | 2,976 (16.45)                     | 2.73 (2.34-3.19)                     |
| History of IHD (no AMI)        | 158 (6.34)                    | 917 (5.07)                        | 1.30 (1.09-1.55)                     |
| History of TIA                 | 85 (3.41)                     | 260 (1.99)                        | 1.74 (1.37-2.22)                     |
| History of AMI                 | 175 (7.02)                    | 971 (5.37)                        | 1.34 (1.13-1.58)                     |
| Heart failure                  | 137 (5.50)                    | 626 (3.46)                        | 1.63 (1.34-1.97)                     |
| History of Atrial fibrillation | 238 (9.55)                    | 906 (5.01)                        | 2.02 (1.74-2.35)                     |
| Hypertension                   | 1,476 (59.21)                 | 9,011 (49.81)                     | 1.49 (1.37-1.63)                     |
| Dyslipidemia                   | 913 (36.62)                   | 6,014 (33.24)                     | 1.15 (1.06-1.26)                     |
| Diabetes                       | 867 (34.78)                   | 3,809 (21.05)                     | 2.01 (1.83-2.20)                     |
| PAD                            | 103 (4.13)                    | 456 (2.52)                        | 1.68 (1.35-2.09)                     |
| COPD                           | 247 (9.91)                    | 1,601 (8.85)                      | 1.15 (0.99-1.33)                     |
| Depression                     | 348 (13.96)                   | 1,790 (9.89)                      | 1.48 (1.30-1.67)                     |
| Hyperuricaemia                 | 117 (4.69)                    | 722 (3.99)                        | 1.21 (0.99-1.48)                     |
| Gout                           | 125 (5.01)                    | 668 (3.69)                        | 1.41 (1.15-1.71)                     |
| Renal failure                  | 112 (4.49)                    | 534 (2.95)                        | 1.54 (1.25-1.90)                     |
| Rheumatoid arthritis           | 14 (0.56)                     | 144 (0.80)                        | 0.70 (0.40-1.21)                     |
| Osteoarthritis                 | 721 (28.92)                   | 4,746 (26.23)                     | 1.14 (1.04-1.26)                     |
| Smoking                        |                               |                                   |                                      |
| Never smoker                   | 839 (33.65)                   | 6,236 (34.47)                     | 1 (ref.)                             |
| Current smoker                 | 694 (27.84)                   | 4,412 (24.39)                     | 1.17 (1.05-1.31)                     |
| Past smoker                    | 247 (9.91)                    | 1,522 (8.41)                      | 1.20 (1.03-1.40)                     |
| No record                      | 713 (28.60)                   | 5,922 (32.73)                     | 0.90 (0.81-1.00)                     |
| Alcohol abuse                  | 522 (20.94)                   | 3,002 (16.59)                     | 1.38 (1.24-1.54)                     |
| BMI (kg/m <sup>2</sup> )       |                               |                                   |                                      |
| <25                            | 306 (12.27)                   | 2,008 (11.10)                     | 1 (ref.)                             |
| 25-30                          | 771 (30.93)                   | 5,269 (29.12)                     | 0.96 (0.83-1.11)                     |
| >30                            | 698 (28.00)                   | 4,341 (23.99)                     | 1.05 (0.91-1.22)                     |
| No record                      | 718 (28.80)                   | 6,474 (35.78)                     | 0.73 (0.63-0.84)                     |

**Table S1 (continued). Characteristics of cases and controls. New-user approach.**

|                          | <b>Cases (%)<br/>n= 2,493</b> | <b>Controls (%)<br/>n= 18,092</b> | <b>Non adjusted<br/>OR*<br/>(95% CI)</b> |
|--------------------------|-------------------------------|-----------------------------------|------------------------------------------|
| Drug use (current) of:   |                               |                                   |                                          |
| Low-dose aspirin         | 470 (18.85)                   | 2,196 (12.14)                     | 1.77 (1.58-1.98)                         |
| Non-aspirin antiplatelet | 147 (5.90)                    | 659 (3.64)                        | 1.68 (1.40-2.02)                         |
| Alpha blockers           | 81 (3.25)                     | 527 (2.91)                        | 1.14 (0.90-1.45)                         |
| Calcium-channel blockers | 384 (15.40)                   | 2,209 (12.21)                     | 1.41 (1.25-1.59)                         |
| Beta-blockers            | 269 (10.79)                   | 1,409 (7.79)                      | 1.46 (1.27-1.68)                         |
| ACE inhibitors           | 568 (22.78)                   | 3,279 (18.12)                     | 1.46 (1.31-1.62)                         |
| AT II receptor blockers  | 301 (12.07)                   | 1,786 (9.87)                      | 1.28 (1.12-1.46)                         |
| Nitrates                 | 164 (6.58)                    | 838 (4.63)                        | 1.49 (1.25-1.77)                         |
| Oral anticoagulants      | 133 (5.33)                    | 767 (4.24)                        | 1.28 (1.06-1.55)                         |
| Diuretics-high ceiling   | 291 (11.67)                   | 1,310 (7.24)                      | 1.79 (1.56-2.05)                         |
| Diuretics-low ceiling    | 231 (9.27)                    | 1,824 (10.08)                     | 0.93 (0.80-1.08)                         |
| Diuretics K sparing      | 47 (1.89)                     | 217 (1.20)                        | 1.59 (1.15-2.18)                         |
| Corticosteroids          | 40 (1.60)                     | 315 (1.74)                        | 0.93 (0.67-1.30)                         |
| NSAIDs                   | 295 (11.83)                   | 2,017 (11.15)                     | 1.09 (0.95-1.25)                         |
| Paracetamol              | 415 (16.65)                   | 2,950 (16.31)                     | 1.09 (0.96-1.24)                         |
| Metamizole               | 92 (3.69)                     | 646 (3.57)                        | 1.07 (0.86-1.34)                         |
| Colchicine               | 16 (0.64)                     | 67 (0.37)                         | 1.77 (1.02-3.06)                         |
| Allopurinol              | 93 (3.73)                     | 559 (3.09)                        | 1.22 (0.97-1.53)                         |
| PPI                      | 537 (21.54)                   | 3,354 (18.54)                     | 1.21 (1.09-1.36)                         |
| H2 blockers              | 76 (3.05)                     | 562 (3.11)                        | 1.00 (0.78-1.27)                         |

\* Adjusted only for matching factors (age, sex and calendar year).

AMI: Acute myocardial infarction; IHD: Ischemic heart disease; TIA: Transient ischemic attack; PAD: Peripheral artery disease; COPD: Chronic obstructive pulmonary disease; BMI: Body mass index; ACE: Angiotensin converting enzyme; ATII: Angiotensin II; NSAIDs: Non-steroidal anti-inflammatory drugs; PPI: Proton pump inhibitors; H2: Histamine receptor type 2.

**Table S2. Risk of ischemic stroke associated with the use of fixed-dose combination of calcium and vitamin D supplements (CaD) and the effect of dose and duration of treatment. New-user approach.**

|                      | <b>Cases (%)<br/>n= 2,493</b> | <b>Controls (%)<br/>n= 18,092</b> | <b>Non adjusted OR<sup>†</sup><br/>(95% CI)</b> | <b>Adjusted OR<sup>‡</sup><br/>(95% CI)</b> |
|----------------------|-------------------------------|-----------------------------------|-------------------------------------------------|---------------------------------------------|
| <i>CaD</i>           |                               |                                   |                                                 |                                             |
| Non use              | 2,407 (96.55)                 | 17,432 (96.35)                    | 1 (ref.)                                        | 1 (ref.)                                    |
| Current              | 27 (1.08)                     | 279 (1.54)                        | 0.68 (0.46-1.02)                                | 0.67 (0.44-1.00)                            |
| Recent               | 39 (1.56)                     | 221 (1.22)                        | 1.25 (0.89-1.77)                                | 1.19 (0.83-1.70)                            |
| Past                 | 20 (0.80)                     | 160 (0.88)                        | 0.87 (0.55-1.39)                                | 0.82 (0.51-1.33)                            |
| <i>Calcium dose*</i> |                               |                                   |                                                 |                                             |
| <1000mg              | 11 (0.44)                     | 121 (0.67)                        | 0.64 (0.34-1.19)                                | 0.64 (0.34-1.20)                            |
| ≥1000mg              | 8 (0.32)                      | 93 (0.51)                         | 0.61 (0.29-1.25)                                | 0.55 (0.26-1.16)                            |
| Unknown              | 8 (0.32)                      | 65 (0.36)                         | 0.87 (0.41-1.81)                                | 0.91 (0.43-1.93)                            |
| <i>Duration*</i>     |                               |                                   |                                                 |                                             |
| ≤180 days            | 18 (0.72)                     | 174 (0.96)                        | 0.73 (0.45-1.19)                                | 0.75 (0.46-1.24)                            |
| >180 days            | 9 (0.36)                      | 105 (0.58)                        | 0.60 (0.30-1.19)                                | 0.54 (0.27-1.09)                            |

\* Among current users.

<sup>†</sup> Adjusted only for matching factors (age, sex and calendar year).

<sup>‡</sup> Adjusted for matching factors and for all factors included in Table 1.

**Table S3. Risk of ischemic stroke associated with the use of calcium in monotherapy (CaM) and the effect of dose and duration of treatment. New-user approach.**

|                      | <b>Cases (%)<br/>n= 2,493</b> | <b>Controls (%)<br/>n= 18,092</b> | <b>Non adjusted OR<sup>†</sup><br/>(95% CI)</b> | <b>Adjusted OR<sup>‡</sup><br/>(95% CI)</b> |
|----------------------|-------------------------------|-----------------------------------|-------------------------------------------------|---------------------------------------------|
| <i>CaM</i>           |                               |                                   |                                                 |                                             |
| Non use              | 2,458 (98.60)                 | 17,884 (98.85)                    | 1 (ref.)                                        | 1 (ref.)                                    |
| Current              | 16 (0.64)                     | 78 (0.43)                         | 1.48 (0.86-2.53)                                | 1.20 (0.69-2.11)                            |
| Recent               | 12 (0.48)                     | 69 (0.38)                         | 1.24 (0.67-2.30)                                | 1.26 (0.67-2.38)                            |
| Past                 | 7 (0.28)                      | 61 (0.34)                         | 0.81 (0.37-1.77)                                | 0.78 (0.35-1.74)                            |
| <i>Calcium dose*</i> |                               |                                   |                                                 |                                             |
| <1000mg              | 6 (0.24)                      | 38 (0.21)                         | 1.05 (0.44-2.48)                                | 0.84 (0.34-2.04)                            |
| ≥1000mg              | 10 (0.40)                     | 17 (0.09)                         | 5.13 (2.27-11.56)                               | 3.99 (1.71-9.34)                            |
| Unknown              | -                             | 23 (0.13)                         | -                                               | -                                           |
| <i>Duration*</i>     |                               |                                   |                                                 |                                             |
| ≤180 days            | 7 (0.28)                      | 49 (0.27)                         | 1.03 (0.47-2.28)                                | 0.82 (0.36-1.87)                            |
| >180 days            | 9 (0.36)                      | 29 (0.16)                         | 2.22 (1.05-4.70)                                | 1.84 (0.85-3.98)                            |

\* Among current users.

† Adjusted only for matching factors (age, sex and calendar year).

‡ Adjusted for matching factors and for all factors included in Table 1.

**Table S4. Evaluation of the potential interaction of fixed-dose combination of calcium and vitamin D supplements (CaD) with sex, age and baseline CV risk with respect to the risk of ischemic stroke.**

| <b>Current use of CaD by</b> | <b>Cases (%)<br/>n= 2,493</b> | <b>Controls (%)<br/>n= 18,092</b> | <b>Non adjusted OR*<br/>(95% CI)</b> | <b>Adjusted OR†<br/>(95% CI)</b> |
|------------------------------|-------------------------------|-----------------------------------|--------------------------------------|----------------------------------|
| <i>Sex</i>                   |                               |                                   |                                      |                                  |
| Male                         | 3 (0.22)                      | 43 (0.43)                         | 0.51 (0.16-1.65)                     | 0.55 (0.17-1.82)                 |
| Female                       | 24 (2.14)                     | 236 (2.94)                        | 0.72 (0.47-1.10)                     | 0.69 (0.44-1.07)                 |
|                              |                               |                                   |                                      | Test for interaction,<br>p=0.726 |
| <i>Age</i>                   |                               |                                   |                                      |                                  |
| < 70                         | 6 (0.69)                      | 57 (0.89)                         | 0.75 (0.32-1.76)                     | 0.67 (0.27-1.68)                 |
| 70 +                         | 21 (1.29)                     | 222 (1.90)                        | 0.66 (0.42-1.04)                     | 0.66 (0.41-1.05)                 |
|                              |                               |                                   |                                      | Test for interaction,<br>p=0.977 |
| <i>CV risk</i>               |                               |                                   |                                      |                                  |
| Low-intermed.                | 19 (1.42)                     | 213 (1.66)                        | 0.83 (0.52-1.33)                     | 0.79 (0.49-1.29)                 |
| High                         | 8 (0.69)                      | 66 (1.25)                         | 0.53 (0.25-1.11)                     | 0.49 (0.22-1.02)                 |
|                              |                               |                                   |                                      | Test for interaction,<br>p=0.302 |

\* Adjusted only for matching factors (age, sex and calendar year).

† Adjusted for matching factors and for all factors included in Table 1.

**Table S5. Evaluation of the potential interaction of calcium in monotherapy (CaM) with sex, age and baseline CV risk with respect to the risk of ischemic stroke.**

| <b>Current use of CaM by</b> | <b>Cases (%)<br/>n= 2,493</b> | <b>Controls (%)<br/>n= 18,092</b> | <b>Non adjusted OR*<br/>(95% CI)</b> | <b>Adjusted OR†<br/>(95% CI)</b> |
|------------------------------|-------------------------------|-----------------------------------|--------------------------------------|----------------------------------|
| <i>Sex</i>                   |                               |                                   |                                      |                                  |
| Male                         | 5 (0.36)                      | 15 (0.15)                         | 2.43 (0.88-6.72)                     | 1.91 (0.66-5.55)                 |
| Female                       | 11 (0.98)                     | 63 (0.79)                         | 1.25 (0.66-2.38)                     | 1.04 (0.53-2.05)                 |
|                              |                               |                                   |                                      | Test for interaction,<br>p=0.347 |
| <i>Age</i>                   |                               |                                   |                                      |                                  |
| < 70                         | 5 (0.57)                      | 24 (0.38)                         | 1.50 (0.57-3.97)                     | 1.25 (0.43-3.60)                 |
| 70 +                         | 11 (0.68)                     | 54 (0.46)                         | 1.47 (0.76-2.81)                     | 1.18 (0.60-2.32)                 |
|                              |                               |                                   |                                      | Test for interaction,<br>p=0.936 |
| <i>CV risk</i>               |                               |                                   |                                      |                                  |
| Low-intermed.                | 10 (0.75)                     | 54 (0.42)                         | 1.76 (0.89-3.46)                     | 1.41 (0.70-2.84)                 |
| High                         | 6 (0.52)                      | 24 (0.46)                         | 1.10 (0.45-2.70)                     | 0.86 (0.34-2.20)                 |
|                              |                               |                                   |                                      | Test for interaction,<br>p=0.406 |

\* Adjusted only for matching factors (age, sex and calendar year).

† Adjusted for matching factors and for the variables described in methods and Table 1.

**Table S6. Number Needed to treat with high-dose calcium supplements to have one patient Harmed (NNH) per year under different scenarios**

|                    |                 | Incidence of ischemic stroke per 100,000 person-years in the population | Incidence of ischemic stroke among users of high-dose calcium supplements in monotherapy ( $\geq 1000\text{mg Ca}$ ) per 100,000 person-years (assuming a RR=2) | Attributable Risk among exposed to high-dose calcium supplements in monotherapy ( $\geq 1000\text{mg Ca}$ ) per 100,000 person-years | NNH |
|--------------------|-----------------|-------------------------------------------------------------------------|-----------------------------------------------------------------------------------------------------------------------------------------------------------------|--------------------------------------------------------------------------------------------------------------------------------------|-----|
| USA <sup>*†</sup>  | Men             | 372                                                                     | 744                                                                                                                                                             | 372                                                                                                                                  | 269 |
|                    | Women           | 288                                                                     | 576                                                                                                                                                             | 288                                                                                                                                  | 347 |
|                    | Overall         | 325                                                                     | 650                                                                                                                                                             | 325                                                                                                                                  | 308 |
|                    | < 65 years      | 191                                                                     | 382                                                                                                                                                             | 191                                                                                                                                  | 524 |
|                    | $\geq 65$ years | 460                                                                     | 920                                                                                                                                                             | 460                                                                                                                                  | 217 |
| Spain <sup>‡</sup> | Men             | 128                                                                     | 256                                                                                                                                                             | 128                                                                                                                                  | 781 |
|                    | Women           | 106                                                                     | 212                                                                                                                                                             | 106                                                                                                                                  | 943 |
|                    | Overall         | 118                                                                     | 236                                                                                                                                                             | 118                                                                                                                                  | 847 |

\*Koton S, Schneider AL, Rosamond WD, Shahar E, Sang Y, Gottesman RF, Coresh J. Stroke incidence and mortality trends in US communities, 1987 to 2011. *JAMA*. 2014;312:259-68.

† Assuming that 87% was ischemic stroke (Koton et al, 2014).

‡ Díaz-Guzman J, Egido JA, Gabriel-Sánchez R, Barberá-Comes G, Fuentes-Gimeno B, Fernández-Perez C. Stroke and transient ischemic attack incidence rate in Spain: the IBERICTUS study. *Cerebrovasc Dis*. 2012; 34: 272-281.
